# Supplementary material for: NaTi3FeO8: a novel anode material for sodium-ion batteries
Source: Royal Society of Chemistry journal article supplement (doi:10.1039/c5ra06808h), 2015-01-01
Supplement: c5ra06808h1.pdf [file c5ra06808h1.pdf]

## Supporting Information

### **NaTi<sub>3</sub>FeO<sub>8</sub>: a novel anode material for sodium-ion batteries**

Junke Hou<sup>a,b</sup>, Yubin Niu<sup>a,b</sup>, Fenglian Yi<sup>a,b</sup>, Sangui Liu<sup>a,b</sup>, Yutao Li<sup>c</sup>, Hong He<sup>a</sup> and Maowen Xu<sup>a,b\*</sup>

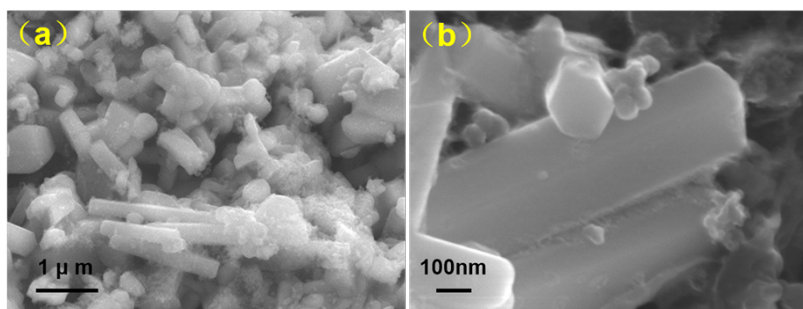

Figure S1. SEM images of NaTi<sub>3</sub>FeO<sub>8</sub> after 200 cycles.

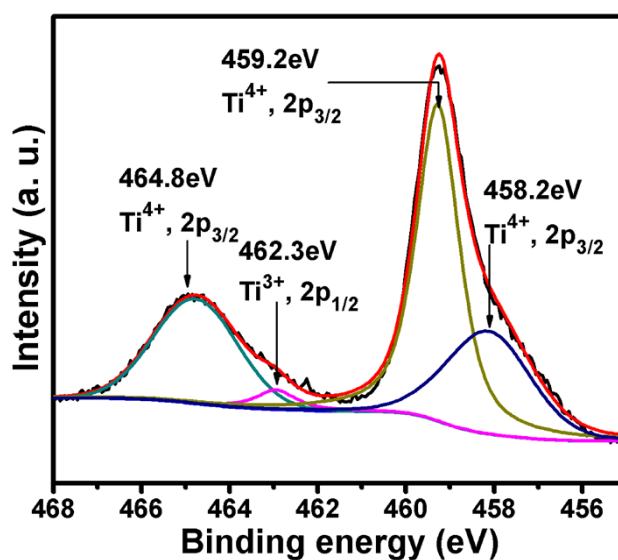

Figure S2. XPS Ti 2p<sub>1/2</sub> and 2p<sub>3/2</sub> spectra of NaTi<sub>3</sub>FeO<sub>8</sub> discharged to 0.01 V.
